# Supplementary material for: Comparison of GWAS models to identify non-additive genetic control of flowering time in sunflower hybrids
Source: PubMed Central journal article supplement (PMC5787229; doi:10.1007/s00122-017-3003-4), 2017-11-02
Supplement: 122_2017_3003_MOESM9_ESM.pdf [file 122_2017_3003_MOESM9_ESM.pdf]

## Comparison of GWAS models to identify non-additive genetic control of flowering time in sunflower hybrids

Fanny Bonnafous · Ghislain Fievet · Nicolas Blanchet · Marie-Claude Boniface · Sébastien Carrère · Jérôme Gouzy · Ludovic Legrand · Gwenola Marage · Emmanuelle Bret-Mestries · Stéphane Munos · Nicolas Pouilly · Patrick Vincourt · Nicolas Langlade · Brigitte Mangin

Received: date / Accepted: date

---

F. Bonnafous

LIPM, Université de Toulouse, INRA, CNRS, Castanet-Tolosan, France

Tel.: +33 5 61 28 57 27

E-mail: fanny.bonnafous@inra.fr

G. Fievet · N. Blanchet · M-C. Boniface · S. Carrère · J. Gouzy · L. Legrand · G. Marage · S. Munos · N. Pouilly · P. Vincourt · N. Langlade · B. Mangin

LIPM, Université de Toulouse, INRA, CNRS, Castanet-Tolosan, France

E. Bret-Mestries

TERRES INOVIA, AGIR, Castanet-Tolosan, France

Fig. S1: Heatmap of phenotypic values per environment (13EX01 to 13EX06). For each heatmap (one environment), the flowering time values are illustrated by hybrid (one square) according to their parents (female lines on the left and male lines at the bottom). Parents are ranked by the mean of their descendants. The more the square are green, the earlier the hybrid has bloomed, and the more the square are red, more the hybrid has bloomed late.

Fig. S2: Flowering time in the sunflower hybrid population across environments. Pearsons correlation values are in red on the top right, trait distribution for each environment is presented in gray (middle), and point clouds with the regression slope (red line) with confidence interval (green shading) are presented on the bottom left. Correlations between two environments are based on 370 hybrids on average (minimum 297, maximum 425).

Fig. S3: Manhattan plot for all models ( $A_{AIS}$ ,  $A_{XX}$ ,  $AD$ ,  $FM$  and  $FMI$ ) for the environment 13EX01. For each model, the p-values off all SNPs of the analysis are represented according to the position of the SNPs on the genome (in Mb). P-values are those of the step of the algorithm where all SNPs that are part of a QTL (red points) have been detected with the model of interest.

Fig. S4: Manhattan plot for all models ( $A_{AIS}$ ,  $A_{XX}$ ,  $AD$ ,  $FM$  and  $FMI$ ) for the environment 13EX02. For each model, the p-values off all SNPs of the analysis are represented according to the position of the SNPs on the genome (in Mb). P-values are those of the step of the algorithm where all SNPs that are part of a QTL (red points) have been detected with the model of interest.

Fig. S5: Manhattan plot for all models ( $A_{AIS}$ ,  $A_{XX}$ ,  $AD$ ,  $FM$  and  $FMI$ ) for the environment 13EX03. For each model, the p-values off all SNPs of the analysis are represented according to the position of the SNPs on the genome (in Mb). P-values are those of the step of the algorithm where all SNPs that are part of a QTL (red points) have been detected with the model of interest.

Fig. S6: Manhattan plot for all models ( $A_{AIS}$ ,  $A_{XX}$ ,  $AD$ ,  $FM$  and  $FMI$ ) for the environment 13EX04. For each model, the p-values off all SNPs of the analysis are represented according to the position of the SNPs on the genome (in Mb). P-values are those of the step of the algorithm where all SNPs that are part of a QTL (red points) have been detected with the model of interest.

Fig. S7: Manhattan plot for all models ( $A_{AIS}$ ,  $A_{XX}$ ,  $AD$ ,  $FM$  and  $FMI$ ) for the environment 13EX06. For each model, the p-values off all SNPs of the analysis are represented according to the position of the SNPs on the genome (in Mb). P-values are those of the step of the algorithm where all SNPs that are part of a QTL (red points) have been detected with the model of interest.

Fig. S8: Manhattan plot of p-values of SNPs in QTL FT09.199. Combination of the association model and environment when significant association were found are illustrated. P-values are calculated in the corresponding model with the EMMAX model approximation. Red lines indicate the positions of associated SNPs. Gene involved in flowering process are positioned and indicated in red.

Table S1: Parts of variance for the models  $A$  ( $A_{XX}$ ),  $AD$ ,  $FM$  and  $FMI$  for all the environments (13EX01 to 13EX06).  $\sigma_a^2$ ,  $\sigma_d^2$ ,  $\sigma_f^2$ ,  $\sigma_m^2$ ,  $\sigma_{fm}^2$  and  $\sigma_e^2$  represent the additive, the dominant, the female, the male, the interaction between female and male, and the residual part of variances, respectively. The model used to compute theses parts of variances is the one without the effects of SNPs, using only kinships. The values of the variance components are shown in parentheses.

|       |                 | 13EX01         | 13EX02         | 13EX03         | 13EX04                             | 13EX06         |
|-------|-----------------|----------------|----------------|----------------|------------------------------------|----------------|
| $A$   | $\sigma_a^2$    | 0.19 (331.47)  | 0.19 (257.83)  | 0.21 (540.81)  | 0.19 (538.11)                      | 0.19 (399.45)  |
|       | $\sigma_e^2$    | 0.81 (1405.78) | 0.81 (1115.82) | 0.79 (2080.87) | 0.81 (2258.57)                     | 0.81 (1663.83) |
| $AD$  | $\sigma_a^2$    | 0.17 (333.85)  | 0.17 (263.37)  | 0.20 (509.98)  | 0.19 (514.87)                      | 0.20 (384.92)  |
|       | $\sigma_d^2$    | 0.15 (279.36)  | 0.16 (239.70)  | 0.16 (40.41)   | 0.01 (13.38)                       | 0.01 (9.86)    |
|       | $\sigma_e^2$    | 0.68 (1301.48) | 0.67 (1031.70) | 0.64 (1947.71) | 0.80 (2115.86)                     | 0.79 (1559.95) |
| $FM$  | $\sigma_f^2$    | 0.30 (585.79)  | 0.28 (456.95)  | 0.37 (1321.31) | 0.32 (1178.76)                     | 0.33(866.58)   |
|       | $\sigma_m^2$    | 0.40 (777.16)  | 0.41 (660.31)  | 0.46 (1644.47) | 0.44 (1617.84)                     | 0.43 (1118.92) |
|       | $\sigma_e^2$    | 0.30 (574.80)  | 0.31 (505.34)  | 0.17(635.86)   | 0.24 (846.81)                      | 0.24 (651.70)  |
| $FMI$ | $\sigma_f^2$    | 0.30 (576.35)  | 0.29 (472.04)  | 0.36 (1332.79) | 0.32 (1178.76)                     | 0.33 (870.75)  |
|       | $\sigma_m^2$    | 0.42 (817.42)  | 0.42 (693.70)  | 0.47 (1719.12) | 0.44 (1617.85)                     | 0.43 (1138.14) |
|       | $\sigma_{fm}^2$ | 0.11 (221.85)  | 0.18 (300.76)  | 0.05 (186.02)  | $\sim 0$ ( $8.57 \times 10^{-7}$ ) | 0.03 (78.51)   |
|       | $\sigma_e^2$    | 0.16 (337.80)  | 0.11 (180.71)  | 0.12 (435.50)  | 0.24 (846.81)                      | 0.21 (567.85)  |
